# Supplementary material for: Flexible solid-state supercapacitor based on tin oxide/reduced graphene oxide/bacterial nanocellulose
Source: Royal Society of Chemistry journal article supplement (doi:10.1039/c8ra05270k), 2018-01-01
Supplement: c8ra05270k1.pdf [file c8ra05270k1.pdf]

## **Flexible solid-state supercapacitor based on tin oxide/reduced graphene oxide/bacterial nanocellulose**

Keng-Ku Liu <sup>a</sup>, Qisheng Jiang <sup>a</sup>, Clayton Kacica <sup>b</sup>, Hamed Gholami Derami <sup>a</sup>, Pratim Biswas <sup>b, \*</sup> and Srikanth Singamaneni <sup>a, \*</sup>

\* Corresponding Authors

<sup>a</sup>. Department of Mechanical Engineering and Materials Science, Institute of Materials Science and Engineering, Washington University in St. Louis, St Louis, Missouri 63130, USA

E-mail: [singamaneni@wustl.edu](mailto:singamaneni@wustl.edu)

<sup>b</sup>. Department of Energy, Environmental and Chemical Engineering, Washington University in St. Louis, St Louis, Missouri 63130, USA

E-mail: [pbiswas@wustl.edu](mailto:pbiswas@wustl.edu)

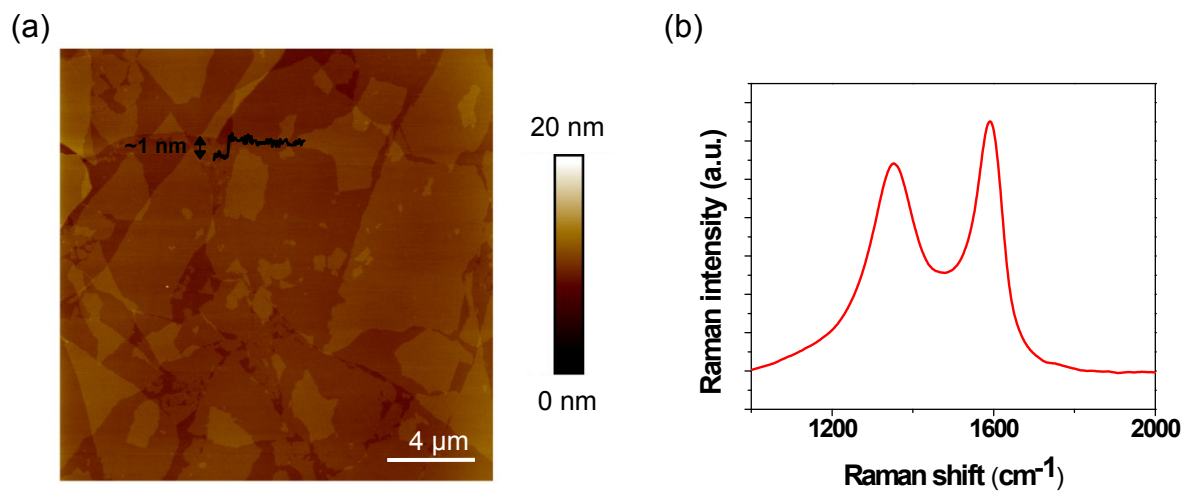

Figure S1. (a) AFM image of GO on a silicon substrate. (b) Raman spectrum of GO.

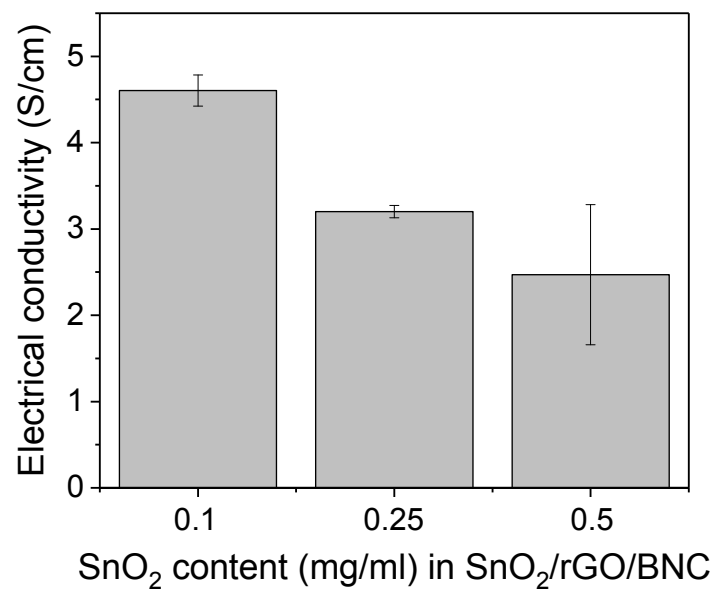

Figure S2. Electrical conductivity of SnO<sub>2</sub>/rGO/BNC electrode with different SnO<sub>2</sub> concentrations.

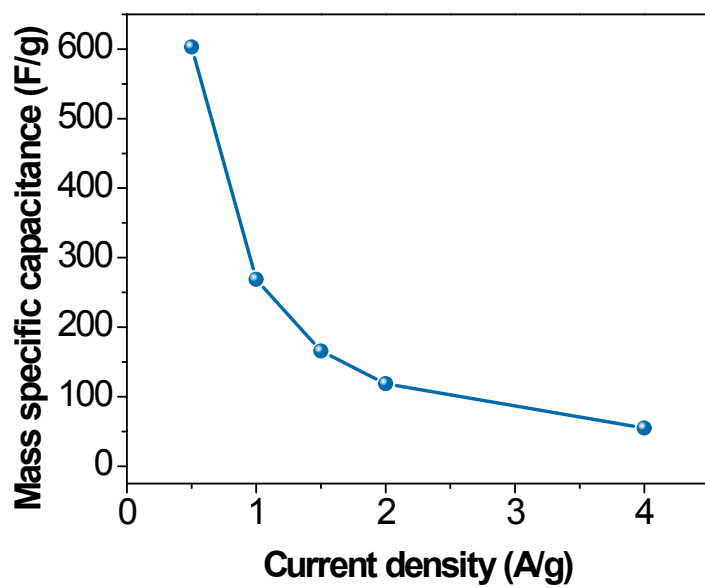

Figure S3. Mass specific capacitance of the PEDOT:PSS/SnO<sub>2</sub>/rGO/BNC supercapacitor device at various current densities.

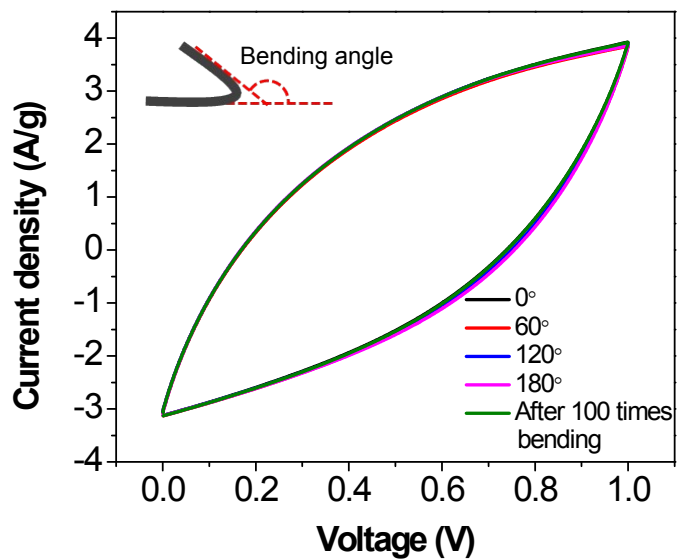

Figure S4. CV curves of the supercapacitor under bending at the scan rate of 100 mV/s.
